# Supplementary material
Source: MDPI journal article supplement (https://www.mdpi.com/2076-3417/14/5/1933)
Supplement: s1 [file s1]

**Table S1.** Concentration values and evaluation results of water pollution

| Sample Information | Physical and Chemical Indicators |                                |       | Sensory Indicators       |        |         |             |           | Pathogen/Microbiota Indicators |      | Grade |
|--------------------|----------------------------------|--------------------------------|-------|--------------------------|--------|---------|-------------|-----------|--------------------------------|------|-------|
| ID                 | CaCO <sub>3</sub>                | HCO <sub>3</sub> <sup>3-</sup> | COD   | Visible objects          | chroma | PH      | Odor        | Turbidity | TEC                            | TBC  |       |
| Limit value        | 450                              | 1000                           | 3     | nothing                  | 15     | 6.5-8.5 | nothing     | 1         | 0                              | 100  |       |
| rainwater          | -                                | -                              | -     | Green sediment           | -      | 6.48    | /           | -         | /                              | /    | 2     |
| 1                  | -                                | -                              | -     | Yellow brown precipitate | -      | -       | /           | -         | /                              | /    | 2     |
| 2                  | -                                | -                              | -     | Yellow brown precipitate | -      | -       | /           | -         | /                              | /    | 2     |
| 3                  | -                                | -                              | 6.71  | Black precipitate        | -      | -       | Rotten eggs | 1.1NTU    | /                              | /    | 4     |
| 4                  | -                                | -                              | 3.47  | Yellow brown precipitate | -      | -       | /           | -         | /                              | /    | 2     |
| 5                  | 467.6                            | -                              | -     | Yellow brown precipitate | -      | -       | /           | -         | 23                             | 470  | 4     |
| 6                  | -                                | -                              | -     | Yellow brown precipitate | -      | -       | /           | -         | /                              | /    | 2     |
| 7                  | -                                | 1201.4                         | -     | Yellow brown precipitate | -      | -       | /           | -         | 49                             | 820  | 4     |
| 8                  | 814.2                            | -                              | -     | Yellow brown precipitate | 16     | 8.68    | /           | 2.6NTU    | 7                              | 270  | 4     |
| 9                  | -                                | -                              | -     | Yellow brown precipitate | -      | -       | /           | -         | 33                             | -    | 4     |
| 10                 | -                                | -                              | 3.96  | Black precipitate        | -      | -       | Stinky odor | 5.4NTU    | /                              | /    | 4     |
| 11                 | -                                | -                              | 28.89 | /                        | 64     | -       | Stinky odor | 5.4NTU    | /                              | /    | 4     |
| 12                 | -                                | 1346.5                         | -     | Yellow brown precipitate | -      | -       | /           | -         | 540                            | 1400 | 4     |
| 13                 | 651.2                            | -                              | -     | Yellow brown precipitate | -      | 6.25    | /           | -         | 1600                           | 610  | 4     |
| 14                 | -                                | -                              | -     | Yellow brown precipitate | -      | -       | /           | -         | /                              | -    | 2     |
| 15                 | -                                | -                              | -     | Yellow brown precipitate | -      | -       | /           | -         | /                              | -    | 2     |
| 16                 | -                                | -                              | -     | Yellow brown precipitate | -      | -       | /           | -         | 33                             | -    | 4     |
| 17                 | 463.55                           | -                              | -     | Black precipitate        | -      | -       | /           | -         | 920                            | 220  | 4     |
| 18                 | 484.57                           | -                              | -     | Yellow brown precipitate | 22     | -       | /           | -         | 1600                           | 3100 | 4     |
| 19                 | -                                | -                              | -     | Yellow brown precipitate | -      | -       | /           | -         | /                              | /    | 2     |

|    |       |        |      |                                 |   |   |   |   |      |     |   |
|----|-------|--------|------|---------------------------------|---|---|---|---|------|-----|---|
| 20 | -     | -      | -    | Yellow brown precipitate        | - | - | / | - | /    | /   | 2 |
| 21 | -     | -      | -    | Black precipitate               | - | - | / | - | /    | /   | 2 |
| 22 | -     | -      | -    | Yellow brown precipitate        | - | - | / | - | /    | /   | 2 |
| 23 | -     | -      | -    | Dark green sheet-like substance | - | - | / | - | /    | /   | 2 |
| 24 | -     | -      | -    | Yellow brown precipitate        | - | - | / | - | /    | /   | 2 |
| 25 | 530.2 | -      | 3.38 | Yellow brown precipitate        | - | - | / | - | 1600 | 350 | 4 |
| 26 | -     | -      | -    | Yellow brown precipitate        | - | - | / | - | /    | /   | 2 |
| 27 | -     | -      | -    | Yellow brown precipitate        | - | - | / | - | /    | /   | 2 |
| 28 | -     | -      | 3.22 | /                               | - | - | / | - | /    | /   | 2 |
| 29 | -     | -      | 3.55 | Yellow brown precipitate        | - | - | / | - | /    | /   | 2 |
| 30 | -     | -      | -    | Yellow brown precipitate        | - | - | / | - | /    | /   | 2 |
| 31 | -     | -      | 4.12 | Yellow brown precipitate        | - | - | / | - | /    | /   | 2 |
| 32 | -     | -      | -    | Yellow brown precipitate        | - | - | / | - | /    | /   | 2 |
| 33 | -     | -      | -    | Yellow brown precipitate        | - | - | / | - | /    | /   | 2 |
| 34 | -     | -      | -    | Yellow brown precipitate        | - | - | / | - | /    | /   | 2 |
| 35 | -     | 1117.5 | -    | Yellow brown precipitate        | - | - | / | - | 11   | -   | 4 |

Note: “/” : Not detected; “-” : Detected not exceeding the standard; “ ” : Excess value
